# Supplementary material for: Differential Metabolomics Reveals Pathogenesis of Pestalotiopsis kenyana Causing Leaf Spot Disease of Zanthoxylum schinifolium
Source: MDPI journal article supplement (doi:10.3390/jof8111208), 2022-11-15
Supplement: s1 [file s1]

Table S1-1 Common and unique differential metabolites in nine groups ( positive ion mode )

| a.Common metabolites of three groups                                      |        |                                                                            |        |                                                                                |        |
|---------------------------------------------------------------------------|--------|----------------------------------------------------------------------------|--------|--------------------------------------------------------------------------------|--------|
| Description                                                               | FC     | Description                                                                | FC     | Description                                                                    | FC     |
| PKP3 vs PKZ3                                                              |        | PKP6 vs PKZ6                                                               |        | PKP15 vs PKZ15                                                                 |        |
| (2S)-4-Oxo-2-phenyl-3,4-dihydro-2H-chromen-7-yl<br>beta-D-glucopyranoside | 0.3554 | (2S)-4-Oxo-2-phenyl-3,4-dihydro-2H-chromen-7-<br>yl beta-D-glucopyranoside | 0.0261 | (2S)-4-Oxo-2-phenyl-3,4-dihydro-<br>2H-chromen-7-yl beta-D-<br>glucopyranoside | 0.0247 |
| O-Desmethylvenlafaxine                                                    | 0.4104 | O-Desmethylvenlafaxine                                                     | 0.0234 | O-Desmethylvenlafaxine                                                         | 0.1669 |
| Estrone                                                                   | 0.3783 | Estrone                                                                    | 0.0967 | Estrone                                                                        | 0.0273 |
| 4-oxo-5-phenylpentanoic acid                                              | 0.4179 | 4-oxo-5-phenylpentanoic acid                                               | 0.1688 | 4-oxo-5-phenylpentanoic acid                                                   | 0.1276 |
| S-(5-Adenosy)-L-Homocysteine                                              | 0.3491 | S-(5-Adenosy)-L-Homocysteine                                               | 0.0430 | S-(5-Adenosy)-L-Homocysteine                                                   | 0.0296 |
| 4-[(4-phenethyl-1,4-diazepan-1-yl)sulfonyl]-2,1,3-<br>benzoxadiazole      | 0.3724 | 4-[(4-phenethyl-1,4-diazepan-1-yl)sulfonyl]-2,1,3-<br>benzoxadiazole       | 0.0282 | 4-[(4-phenethyl-1,4-diazepan-1-<br>yl)sulfonyl]-2,1,3-benzoxadiazole           | 0.0755 |
| YNH                                                                       | 0.3570 | YNH                                                                        | 0.1992 | YNH                                                                            | 0.2837 |
| 3-(4-hydroxy-3-methoxyphenyl)propanoic acid                               | 0.2818 | 3-(4-hydroxy-3-methoxyphenyl)propanoic acid                                | 0.0473 | 3-(4-hydroxy-3-<br>methoxyphenyl)propanoic acid                                | 0.2104 |

|                                                                    |        |                                                                    |        |                                                                    |        |
|--------------------------------------------------------------------|--------|--------------------------------------------------------------------|--------|--------------------------------------------------------------------|--------|
| 5-[(Benzoyloxy)methyl]-4,5,6-trihydroxy-2-cyclohexen-1-yl benzoate | 0.4210 | 5-[(Benzoyloxy)methyl]-4,5,6-trihydroxy-2-cyclohexen-1-yl benzoate | 0.1487 | 5-[(Benzoyloxy)methyl]-4,5,6-trihydroxy-2-cyclohexen-1-yl benzoate | 0.0677 |
| 2-phenyl-4H-furo[2,3-h]chromen-4-one                               | 6.6762 | 2-phenyl-4H-furo[2,3-h]chromen-4-one                               | 6.2889 | 2-phenyl-4H-furo[2,3-h]chromen-4-one                               | 3.4339 |
| 1-methyl-3,5-di(1-naphthylmethylidene)piperidin-4-one              | 0.4821 | 1-methyl-3,5-di(1-naphthylmethylidene)piperidin-4-one              | 2.7019 | 1-methyl-3,5-di(1-naphthylmethylidene)piperidin-4-one              | 3.4666 |
| Scopolamine HBr trihydrate                                         | 0.4772 | Scopolamine HBr trihydrate                                         | 3.2040 | Scopolamine HBr trihydrate                                         | 0.4589 |
| Sulforidazine                                                      | 0.5178 | Sulforidazine                                                      | 3.6311 | Sulforidazine                                                      | 3.5567 |
| (5-L-Glutamyl)-L-Amino Acid                                        | 2.8190 | (5-L-Glutamyl)-L-Amino Acid                                        | 2.6944 | (5-L-Glutamyl)-L-Amino Acid                                        | 3.8875 |
| 2-(2-acetyl-3,5-dihydroxyphenyl)acetic acid                        | 0.4127 | 2-(2-acetyl-3,5-dihydroxyphenyl)acetic acid                        | 0.4823 | 2-(2-acetyl-3,5-dihydroxyphenyl)acetic acid                        | 0.3825 |
| 2-[(carboxymethyl)(methyl)amino]-5-methoxybenzoic acid             | 0.3242 | 2-[(carboxymethyl)(methyl)amino]-5-methoxybenzoic acid             | 2.8119 | 2-[(carboxymethyl)(methyl)amino]-5-methoxybenzoic acid             | 3.0941 |
| N-Acetylhistidine                                                  | 2.5609 | N-Acetylhistidine                                                  | 2.3594 | N-Acetylhistidine                                                  | 4.2823 |

|                                                                  |        |                                                                  |        |                                                                  |        |
|------------------------------------------------------------------|--------|------------------------------------------------------------------|--------|------------------------------------------------------------------|--------|
| 2-(1H-indol-3-yl)acetic acid                                     | 0.4299 | 2-(1H-indol-3-yl)acetic acid                                     | 1.7498 | 2-(1H-indol-3-yl)acetic acid                                     | 1.8358 |
| 4-oxo-4-(5,6,7,8-tetrahydronaphthalen-1-ylamino)but-2-enoic acid | 2.5986 | 4-oxo-4-(5,6,7,8-tetrahydronaphthalen-1-ylamino)but-2-enoic acid | 2.3740 | 4-oxo-4-(5,6,7,8-tetrahydronaphthalen-1-ylamino)but-2-enoic acid | 5.2933 |
| PS (4:0/16:3)                                                    | 0.5224 | PS (4:0/16:3)                                                    | 1.7906 | PS (4:0/16:3)                                                    | 1.7669 |
| Traumatic acid                                                   | 0.5362 | Traumatic acid                                                   | 1.6390 | Traumatic acid                                                   | 2.3397 |
| Lysops 22:5                                                      | 0.3132 | Lysops 22:5                                                      | 2.0085 | Lysops 22:5                                                      | 3.4228 |

**b. Unique differential metabolites to both groups**

| Description                         | FC      | Description                                                           | FC      | Description             | FC       |
|-------------------------------------|---------|-----------------------------------------------------------------------|---------|-------------------------|----------|
| PKP3 vs PKZ3                        |         | PKP6 vs PKZ6                                                          |         | PKP15 vs PKZ15          |          |
| HPK                                 | 42.5220 | 3-(3,4-dimethoxyphenyl)-1-(2-hydroxy-4,6-dimethoxyphenyl)propan-1-one | 26.3724 | 2'-O-Methyladenosine    | 106.0934 |
| Cytosine                            | 34.1296 | Cyclocytidine                                                         | 25.2060 | 4-Hydroxytamoxifen      | 82.0197  |
| 5 $\alpha$ -Tetrahydrocortisol      | 33.2998 | LLK                                                                   | 24.9814 | LDGTS 17:2              | 70.3735  |
| NMK                                 | 31.3431 | $\alpha$ -Zearalanol                                                  | 22.2896 | LDGTS 18:1              | 43.1826  |
| Arachidonoyl ethanolamide phosphate | 23.5329 | Norbutorphanol                                                        | 18.7200 | N2,N2-Dimethylguanosine | 32.5020  |

|                                             |         |                                                                       |         |                                               |         |
|---------------------------------------------|---------|-----------------------------------------------------------------------|---------|-----------------------------------------------|---------|
| 5 $\alpha$ -Dihydrotestosterone glucuronide | 21.0319 | Diacetoxyscirpenol                                                    | 18.0943 | ethyl 4-[(6-methyl-3-pyridazinyl)oxy]benzoate | 19.1041 |
| CYM-5442                                    | 20.5434 | TAG (14:0-16:0-18:2)                                                  | 15.7055 | PPK                                           | 16.2635 |
| RNH                                         | 14.6257 | (+)-Evodiamine                                                        | 11.9432 | TAG (16:0-16:0-18:1)                          | 15.3346 |
| 6 $\beta$ -Hydroxy-21-desacetyl deflazacort | 14.2660 | 3,6-bis[(1H-indol-3-yl)methyl]piperazine-2,5-dione                    | 11.5920 | Phe-Phe                                       | 13.3295 |
| ELK                                         | 14.1748 | 2-[(3S)-1-(1-Methyl-4-piperidinyl)-3-pyrrolidinyl]-1H-benzimidazole   | 10.9931 | KMK                                           | 11.9071 |
| DGTS (22:0/18:2)                            | 13.5661 | 2,3-dinor Thromboxane B2                                              | 10.9593 | 4-Nitrosodiphenylamine                        | 11.1948 |
| D-Panthenol                                 | 12.9691 | N'-{6-[(5-chloro-3-pyridyl)oxy]-3-pyridyl}-N,N-dimethyliminoformamide | 10.8705 | Morphine D3                                   | 10.6059 |
| 6-Keto-prostaglandin f1 alpha               | 12.4943 | PC (3:0/16:2)                                                         | 9.9746  | PC (3:0/16:2)                                 | 9.0632  |
| ANK                                         | 11.3395 | LDGTS 18:3                                                            | 9.4950  | LPH                                           | 8.4242  |
| AMK                                         | 11.2557 | FPH                                                                   | 8.8116  | RMK                                           | 8.2795  |
| PPH                                         | 10.9384 | N,N'-di[4-(2,6-dimethylmorpholino)phenyl]thiourea                     | 8.5942  | Epinastine                                    | 8.2677  |

|                                       |         |                                                           |        |                                                             |        |
|---------------------------------------|---------|-----------------------------------------------------------|--------|-------------------------------------------------------------|--------|
| MNK                                   | 10.8892 | 3-(2-Naphthyl)-D-Alanine                                  | 8.0721 | N1-(3-pyridyl)-4-<br>[(dipropylamino)sulfonyl]benzamid<br>e | 6.9518 |
| EPK                                   | 10.8166 | TAG (15:0-18:2-18:2)                                      | 7.9324 | DLK                                                         | 6.7466 |
| AKB48 N-(4-hydroxypentyl) metabolite  | 9.9992  | APK                                                       | 7.7768 | Ecgonine methyl ester                                       | 6.1132 |
| UR-144 N-(2-hydroxypentyl) metabolite | 9.9882  | 2-(2-amino-3-methylbutanamido)-3-<br>phenylpropanoic acid | 7.7087 | 2-(14,15-Epoxyeicosatrienoyl)<br>glycerol                   | 5.8118 |

| a.Common metabolites of three groups                                             |        |                                                                                  |         |                                                                                  |        |
|----------------------------------------------------------------------------------|--------|----------------------------------------------------------------------------------|---------|----------------------------------------------------------------------------------|--------|
| Description                                                                      | FC     | Description                                                                      | FC      | Description                                                                      | FC     |
| PKP3 vs PKP6                                                                     |        | PKP3 vs PKP15                                                                    |         | PKP6 vs PKP15                                                                    |        |
| -(-)-alpha-Amino-epsilon-Caprolactam                                             | 5.8650 | L-(-)-alpha-Amino-epsilon-Caprolactam                                            | 16.9124 | L-(-)-alpha-Amino-epsilon-Caprolactam                                            | 2.8836 |
| 2- {[methyl(2,3,4,5,6-<br>pentahydroxyhexyl)amino]methylidene} malon<br>onitrile | 4.5762 | 2- {[methyl(2,3,4,5,6-<br>pentahydroxyhexyl)amino]methylidene} ma<br>lononitrile | 17.0282 | 2- {[methyl(2,3,4,5,6-<br>pentahydroxyhexyl)amino]methylidene<br>} malononitrile | 3.7210 |
| 4-(4-methoxyphenyl)-6-pyridin-4-yl-1,3,5-                                        | 0.2498 | 4-(4-methoxyphenyl)-6-pyridin-4-yl-1,3,5-                                        | 0.0618  | 4-(4-methoxyphenyl)-6-pyridin-4-yl-                                              | 0.2475 |

|                                                                        |        |                                                                        |         |                                                                        |        |
|------------------------------------------------------------------------|--------|------------------------------------------------------------------------|---------|------------------------------------------------------------------------|--------|
| triazin-2(3H)-one                                                      |        | triazin-2(3H)-one                                                      |         | 1,3,5-triazin-2(3H)-one                                                |        |
| mesityl (4-methylphenyl) sulfone                                       | 3.5726 | mesityl (4-methylphenyl) sulfone                                       | 11.2075 | mesityl (4-methylphenyl) sulfone                                       | 3.1371 |
| Oleanolic acid                                                         | 2.2223 | Oleanolic acid                                                         | 4.7635  | Oleanolic acid                                                         | 2.1434 |
| L-Pyroglutamic acid                                                    | 2.3339 | L-Pyroglutamic acid                                                    | 5.3126  | L-Pyroglutamic acid                                                    | 2.2762 |
| 3-(dimethylamino)-1-(5-methyl-3-phenyl-4-isoxazolyl)-2-propen-1-one    | 2.4155 | 3-(dimethylamino)-1-(5-methyl-3-phenyl-4-isoxazolyl)-2-propen-1-one    | 5.6490  | 3-(dimethylamino)-1-(5-methyl-3-phenyl-4-isoxazolyl)-2-propen-1-one    | 2.3386 |
| N-Acetylsphingosine                                                    | 0.5891 | N-Acetylsphingosine                                                    | 0.3010  | N-Acetylsphingosine                                                    | 0.5111 |
| Anserine                                                               | 3.4557 | Anserine                                                               | 9.3706  | Anserine                                                               | 2.7116 |
| Taurolithocholic acid sodium salt                                      | 2.7700 | Taurolithocholic acid sodium salt                                      | 5.7488  | Taurolithocholic acid sodium salt                                      | 2.0754 |
| Palmitic Acid                                                          | 0.4003 | Palmitic Acid                                                          | 0.1063  | Palmitic Acid                                                          | 0.2656 |
| 3-(3-methylbut-2-en-1-yl)-3H-purin-6-amine                             | 0.3538 | 3-(3-methylbut-2-en-1-yl)-3H-purin-6-amine                             | 0.0999  | 3-(3-methylbut-2-en-1-yl)-3H-purin-6-amine                             | 0.2823 |
| N-(4-methoxy-1-methyl-1H-indazol-3-yl)-5-methyl-3-isoxazolecarboxamide | 0.1968 | N-(4-methoxy-1-methyl-1H-indazol-3-yl)-5-methyl-3-isoxazolecarboxamide | 0.4869  | N-(4-methoxy-1-methyl-1H-indazol-3-yl)-5-methyl-3-isoxazolecarboxamide | 2.4735 |

**b. Unique differential metabolites to both groups**

| Description | FC | Description | FC | Description | FC |
|-------------|----|-------------|----|-------------|----|
|-------------|----|-------------|----|-------------|----|

| PKP3 vs PKP6                                |          | PKP3 vs PKP15                                                          |          | PKP6 vs PKP15                                                       |          |
|---------------------------------------------|----------|------------------------------------------------------------------------|----------|---------------------------------------------------------------------|----------|
| MPK                                         | 109.1210 | Laudanosine                                                            | 372.8409 | 3,3-dimethyl-5-oxo-5-(2-piperidinoanilino)pentanoic acid            | 231.7395 |
| Vitexin                                     | 46.9546  | 13,14-dihydro-15-keto-PGD2                                             | 183.3651 | Solanine                                                            | 58.7957  |
| Morphine                                    | 36.3701  | 5-Methyl-8-nitro-3-spirocyclohexyl-2,3,4,5-tetrahydro-1H-2-benzazepine | 158.3627 | 13,14-dihydro-15-keto-PGD2                                          | 51.9484  |
| CYM-5442                                    | 27.2316  | Solanine                                                               | 149.4759 | Solanidine                                                          | 46.0932  |
| PE (18:2/18:3)                              | 23.8710  | Solanidine                                                             | 127.0107 | 5-(tert-butyl)-N-[4-(trifluoromethyl)phenyl]thiophene-2-carboxamide | 34.0241  |
| Arachidonoyl ethanolamide phosphate         | 21.3515  | NMK                                                                    | 89.5911  | Orsellinic acid ethyl ester                                         | 32.1341  |
| Cytosine                                    | 19.7906  | 5-(tert-butyl)-N-[4-(trifluoromethyl)phenyl]thiophene-2-carboxamide    | 60.7215  | 5-chloro-2,8-dimethyl-4-[(3-nitro-2-pyridyl)oxy]quinoline           | 26.1835  |
| 4-Methyl- $\alpha$ -ethyltryptamine         | 18.1591  | CYM-5442                                                               | 51.4390  | Tanespimycin                                                        | 21.9691  |
| 5 $\alpha$ -Dihydrotestosterone glucuronide | 17.4779  | PLK                                                                    | 49.1271  | 4-[4-chloro-2-nitro-5-(1H-pyrrol-1-                                 | 21.1901  |

|                                                        |         |                                                                  |         |                                                                   |         |
|--------------------------------------------------------|---------|------------------------------------------------------------------|---------|-------------------------------------------------------------------|---------|
|                                                        |         |                                                                  |         | yl)phenyl]morpholine                                              |         |
| NMK                                                    | 17.0243 | Vitexin                                                          | 49.0782 | N1-(1H-1,2,4-triazol-3-yl)-2-hydroxybenzamide                     | 21.0589 |
| 5 $\alpha$ -Tetrahydrocortisol                         | 16.3831 | 5 $\alpha$ -Tetrahydrocortisol                                   | 48.3739 | Veratramine                                                       | 17.2848 |
| PC (18:2e/15:0)                                        | 15.4652 | 4-[(4-phenethyl-1,4-diazepan-1-yl)sulfonyl]-2,1,3-benzoxadiazole | 48.3145 | 2-Acetylpyridine                                                  | 16.4635 |
| 6 $\beta$ -Hydroxy-21-desacetyl deflazacort            | 15.2840 | Morphine                                                         | 36.7121 | Norbutorphanol                                                    | 16.2785 |
| DAG (15:0/18:2)                                        | 14.5549 | RMH                                                              | 36.1905 | Flavin Adenine Dinucleotide                                       | 16.1963 |
| 2-(2,6-dimethoxyphenyl)-5,6-dimethoxy-4H-chromen-4-one | 13.7549 | Oxohongdenafil                                                   | 28.9541 | Folinic acid                                                      | 16.0666 |
| ANK                                                    | 13.0772 | DGTS (22:0/18:2)                                                 | 24.1956 | 4-(3,4-dihydro-2H-1,5-benzodioxepin-7-ylamino)-4-oxobutanoic acid | 12.5485 |
| AMK                                                    | 12.2692 | EKK                                                              | 23.5680 | (3S,9aS)-3-benzyl-octahydro-1H-pyrido[1,2-a]pyrazin-1-one         | 11.5776 |
| 6-Keto-prostaglandin fl alpha                          | 12.2365 | S-(5-Adenosyl)-L-Homocysteine                                    | 22.1183 | Emetine                                                           | 11.2995 |
| 4-methyl-5-oxo-2-pentyl-2,5-dihydrofuran-3-            | 10.1796 | 5 $\alpha$ -Dihydrotestosterone glucuronide                      | 21.3255 | UR144 N-(5-hydroxypentyl) metabolite                              | 11.2598 |



carboxylic acid

|                                      |        |            |         |                                                    |         |
|--------------------------------------|--------|------------|---------|----------------------------------------------------|---------|
| AKB48 N-(4-hydroxypentyl) metabolite | 9.4623 | Sinomenine | 20.1785 | 3,6-bis[(1H-indol-3-yl)methyl]piperazine-2,5-dione | 10.7685 |
|--------------------------------------|--------|------------|---------|----------------------------------------------------|---------|

**a.Common metabolites of three groups**

| Description                       | FC      | Description                       | FC       | Description                       | FC      |
|-----------------------------------|---------|-----------------------------------|----------|-----------------------------------|---------|
| PKZ3 vs PKZ6                      |         | PKPZ3 vs PKZ15                    |          | PKZ6 vs PKZ15                     |         |
| N-acetyl-L-ornithine              | 1.9835  | N-acetyl-L-ornithine              | 10.8300  | N-acetyl-L-ornithine              | 5.4601  |
| LDGTS 17:2                        | 3.1748  | LDGTS 17:2                        | 103.0692 | LDGTS 17:2                        | 32.4650 |
| SPH                               | 0.4534  | SPH                               | 9.6294   | SPH                               | 7.4315  |
| 3-Hydroxypicolinic acid           | 1.8268  | 3-Hydroxypicolinic acid           | 5.5016   | 3-Hydroxypicolinic acid           | 3.0116  |
| LDGTS 18:1                        | 16.8308 | LDGTS 18:1                        | 475.5962 | LDGTS 18:1                        | 28.2575 |
| Sinomenine                        | 2.8726  | Sinomenine                        | 21.0530  | Sinomenine                        | 7.3290  |
| 6-Acetylmorphine                  | 6.7303  | 6-Acetylmorphine                  | 21.9836  | 6-Acetylmorphine                  | 3.2663  |
| β-Asarone                         | 0.4513  | β-Asarone                         | 0.1111   | β-Asarone                         | 0.2462  |
| 4-(2,3-dihydro-1,4-benzodioxin-6- | 0.3500  | 4-(2,3-dihydro-1,4-benzodioxin-6- | 0.0968   | 4-(2,3-dihydro-1,4-benzodioxin-6- | 0.2764  |

|                                                           |        |                                                           |         |                                                           |        |
|-----------------------------------------------------------|--------|-----------------------------------------------------------|---------|-----------------------------------------------------------|--------|
| yl)butanoic acid                                          |        | yl)butanoic acid                                          |         | yl)butanoic acid                                          |        |
| ethyl 2-amino-4-(2-thienyl)thiophene-3-carboxylate        | 4.6562 | ethyl 2-amino-4-(2-thienyl)thiophene-3-carboxylate        | 38.5094 | ethyl 2-amino-4-(2-thienyl)thiophene-3-carboxylate        | 8.2706 |
| 6 $\alpha$ -Naltrexol                                     | 3.0933 | 6 $\alpha$ -Naltrexol                                     | 11.5909 | 6 $\alpha$ -Naltrexol                                     | 3.7472 |
| DQH                                                       | 3.5887 | DQH                                                       | 15.9283 | DQH                                                       | 4.4384 |
| Ureidosuccinic acid                                       | 1.7354 | Ureidosuccinic acid                                       | 3.2689  | Ureidosuccinic acid                                       | 1.8837 |
| L-threo-3-Phenylserine                                    | 1.6274 | L-threo-3-Phenylserine                                    | 3.3724  | L-threo-3-Phenylserine                                    | 2.0723 |
| PC (3:0/16:2)                                             | 8.2977 | PC (3:0/16:2)                                             | 51.9913 | PC (3:0/16:2)                                             | 6.2657 |
| methyl 2,5-dimethyl-1H-pyrrole-3-carboxylate              | 1.6985 | methyl 2,5-dimethyl-1H-pyrrole-3-carboxylate              | 2.6794  | methyl 2,5-dimethyl-1H-pyrrole-3-carboxylate              | 1.5775 |
| 4,7-dimethylpyrazolo[5,1-c][1,2,4]triazine-3-carbonitrile | 1.6402 | 4,7-dimethylpyrazolo[5,1-c][1,2,4]triazine-3-carbonitrile | 2.5292  | 4,7-dimethylpyrazolo[5,1-c][1,2,4]triazine-3-carbonitrile | 1.5420 |
| 3-amino-4-(propylamino)cyclobut-3-ene-1,2-dione           | 2.0457 | 3-amino-4-(propylamino)cyclobut-3-ene-1,2-dione           | 5.0889  | 3-amino-4-(propylamino)cyclobut-3-ene-1,2-dione           | 2.4875 |
| 4-methoxy-6-(prop-2-en-1-yl)-2H-1,3-benzodioxole          | 0.3486 | 4-methoxy-6-(prop-2-en-1-yl)-2H-1,3-benzodioxole          | 0.1541  | 4-methoxy-6-(prop-2-en-1-yl)-2H-1,3-benzodioxole          | 0.4420 |

|                                                                 |        |                                                                 |         |                                                                 |        |
|-----------------------------------------------------------------|--------|-----------------------------------------------------------------|---------|-----------------------------------------------------------------|--------|
| methyl 3,4,5-trihydroxycyclohex-1-ene-1-carboxylate             | 0.5423 | methyl 3,4,5-trihydroxycyclohex-1-ene-1-carboxylate             | 0.2983  | methyl 3,4,5-trihydroxycyclohex-1-ene-1-carboxylate             | 0.5502 |
| 2,3-dihydroxypropyl 12-methyltridecanoate                       | 1.6174 | 2,3-dihydroxypropyl 12-methyltridecanoate                       | 2.7786  | 2,3-dihydroxypropyl 12-methyltridecanoate                       | 1.7179 |
| N1-(1H-indol-4-yl)cyclohexane-1-carboxamide                     | 2.1259 | N1-(1H-indol-4-yl)cyclohexane-1-carboxamide                     | 4.7208  | N1-(1H-indol-4-yl)cyclohexane-1-carboxamide                     | 2.2205 |
| 5-S-cysteinyldopa                                               | 2.0368 | 5-S-cysteinyldopa                                               | 5.4104  | 5-S-cysteinyldopa                                               | 2.6563 |
| Normeperidine                                                   | 1.8581 | Normeperidine                                                   | 3.9017  | Normeperidine                                                   | 2.0998 |
| (2S)-2-(2-hydroxypropan-2-yl)-2H,3H,7H-furo[3,2-g]chromen-7-one | 0.3491 | (2S)-2-(2-hydroxypropan-2-yl)-2H,3H,7H-furo[3,2-g]chromen-7-one | 0.0739  | (2S)-2-(2-hydroxypropan-2-yl)-2H,3H,7H-furo[3,2-g]chromen-7-one | 0.2117 |
| 5 $\alpha$ -Dihydrotestosterone                                 | 5.1361 | 5 $\alpha$ -Dihydrotestosterone                                 | 17.4101 | 5 $\alpha$ -Dihydrotestosterone                                 | 3.3898 |
| cis-4-Hydroxy-D-proline                                         | 1.8531 | cis-4-Hydroxy-D-proline                                         | 4.6355  | cis-4-Hydroxy-D-proline                                         | 2.5015 |
| DL-Tryptophan                                                   | 0.2123 | DL-Tryptophan                                                   | 0.0530  | DL-Tryptophan                                                   | 0.2497 |
| Traumatic acid                                                  | 1.5896 | Traumatic acid                                                  | 3.6029  | Traumatic acid                                                  | 2.2665 |
| 2,6-Dihydroxybenzoic acid                                       | 1.8608 | 2,6-Dihydroxybenzoic acid                                       | 3.1325  | 2,6-Dihydroxybenzoic acid                                       | 1.6834 |

|                                                                       |           |                                                                       |           |                                                                       |           |
|-----------------------------------------------------------------------|-----------|-----------------------------------------------------------------------|-----------|-----------------------------------------------------------------------|-----------|
| Glaucine                                                              | 2.3384    | Glaucine                                                              | 7.2770    | Glaucine                                                              | 3.1119    |
| Leucine-enkephalin                                                    | 1.5235    | Leucine-enkephalin                                                    | 3.5507    | Leucine-enkephalin                                                    | 2.3306    |
| Pregnenolone                                                          | 2.3033    | Pregnenolone                                                          | 5.9435    | Pregnenolone                                                          | 2.5804    |
| Jasmonic acid                                                         | 0.6026    | Jasmonic acid                                                         | 0.2804    | Jasmonic acid                                                         | 0.4653    |
| 1-(2-chlorophenyl)-6,7-dimethoxy-<br>1,4-dihydroisoquinolin-3(2H)-one | 0.1911    | 1-(2-chlorophenyl)-6,7-dimethoxy-<br>1,4-dihydroisoquinolin-3(2H)-one | 4.0087    | 1-(2-chlorophenyl)-6,7-dimethoxy-1,4-<br>dihydroisoquinolin-3(2H)-one | 20.9820   |
| (1E,4E)-1,5-bis(4-<br>methoxyphenyl)penta-1,4-dien-3-<br>one          | 1.7751    | (1E,4E)-1,5-bis(4-<br>methoxyphenyl)penta-1,4-dien-3-one              | 4.1416    | (1E,4E)-1,5-bis(4-methoxyphenyl)penta-<br>1,4-dien-3-one              | 2.3331    |
| Cyclocytidine                                                         | 37.9393   | Cyclocytidine                                                         | 8.8710    | Cyclocytidine                                                         | 0.2338    |
| Octyl hydrogen phthalate                                              | 0.5614    | Octyl hydrogen phthalate                                              | 0.2770    | Octyl hydrogen phthalate                                              | 0.4935    |
| 3,4,5-Trimethoxyphenyl β-D-<br>glucopyranoside                        | 0.4055    | 3,4,5-Trimethoxyphenyl β-D-<br>glucopyranoside                        | 0.0607    | 3,4,5-Trimethoxyphenyl β-D-<br>glucopyranoside                        | 0.1497    |
| <b>b. Unique differential metabolites to both groups</b>              |           |                                                                       |           |                                                                       |           |
| <b>Description</b>                                                    | <b>FC</b> | <b>Description</b>                                                    | <b>FC</b> | <b>Description</b>                                                    | <b>FC</b> |
| PKZ3 vs PKZ6                                                          |           | PKPZ3 vs PKZ15                                                        |           | PKZ6 vs PKZ15                                                         |           |

|                                                                        |         |                                                                        |          |                                                                       |          |
|------------------------------------------------------------------------|---------|------------------------------------------------------------------------|----------|-----------------------------------------------------------------------|----------|
| LDGTS 16:0                                                             | 26.3936 | LDGTS 17:1                                                             | 140.8284 | Vitexin                                                               | 100.1629 |
| LDGTS 17:1                                                             | 21.5017 | LDGTS 16:0                                                             | 127.2284 | Emetine                                                               | 74.4680  |
| LLK                                                                    | 16.3355 | Vitexin                                                                | 108.6972 | 13,14-dihydro-15-keto-PGD2                                            | 38.6106  |
| YLK                                                                    | 15.0632 | 13,14-dihydro-15-keto-PGD2                                             | 41.5953  | N1-(3,4,5-trimethoxyphenyl)-3-(2-chlorophenyl)acrylamide              | 36.5395  |
| Pantetheine                                                            | 12.6181 | 2'-O-Methyladenosine                                                   | 39.2806  | Solanidine                                                            | 25.1998  |
| LDGTS 18:3                                                             | 11.1383 | Oxohongdenafil                                                         | 36.3837  | Solanine                                                              | 23.3418  |
| TAG (18:2-18:3-18:3)                                                   | 10.9461 | Laudanosine                                                            | 36.1097  | S-Lactoylglutathione                                                  | 20.9944  |
| 5-Methyl-8-nitro-3-spirocyclohexyl-2,3,4,5-tetrahydro-1H-2-benzazepine | 9.6036  | Shikonin                                                               | 34.7888  | CTP                                                                   | 19.7332  |
| Diacetoxyscirpenol                                                     | 9.4983  | MPK                                                                    | 34.1119  | Tanespimycin                                                          | 15.0323  |
| Senecionine                                                            | 7.9284  | 5-Methyl-8-nitro-3-spirocyclohexyl-2,3,4,5-tetrahydro-1H-2-benzazepine | 32.6799  | (2E)-N-(4-acetamidobutyl)-3-(4-hydroxy-3-methoxyphenyl)prop-2-enamide | 14.1271  |
| Norbutorphanol                                                         | 7.8360  | Pantetheine                                                            | 32.3356  | N-Desmethylvenlafaxine                                                | 13.7286  |
| Retrorsine                                                             | 7.4539  | Solanidine                                                             | 24.4374  | PQH                                                                   | 13.2643  |

|                                                                       |        |                              |         |                                                                  |         |
|-----------------------------------------------------------------------|--------|------------------------------|---------|------------------------------------------------------------------|---------|
| Oxohongdenafil                                                        | 7.3546 | Solanine                     | 19.8990 | 4'-Methoxy- $\alpha$ -ethylaminovalerophenone                    | 13.2113 |
| 6 $\beta$ -Hydroxycortisol                                            | 6.8536 | S-Lactoylglutathione         | 19.4518 | 2'-O-Methyladenosine                                             | 12.5095 |
| 3-(3,4-dimethoxyphenyl)-1-(2-hydroxy-4,6-dimethoxyphenyl)propan-1-one | 6.4459 | LDGTS 18:3                   | 18.9986 | Acetylcholine                                                    | 12.1751 |
| Ergosterol peroxide                                                   | 6.3987 | 6-Keto-prostaglandin f1alpha | 17.7117 | PC (4:0/16:3)                                                    | 11.6409 |
| Diflorasone                                                           | 6.1251 | CTP                          | 13.8665 | (11E,15Z)-9,10,13-trihydroxyoctadeca-11,15-dienoic acid          | 11.0474 |
| 3-(1-benzylpiperidin-4-yl)-3H-[1,2,3]triazolo[4,5-b]pyridine          | 5.7541 | LPE 22:4                     | 13.8613 | Tropine                                                          | 10.8560 |
| Glycerophospho-N-palmitoyl ethanolamine                               | 5.5267 | Thymopentin                  | 13.4839 | 4-morpholino-3-nitrobenzene-1-sulfonamide                        | 10.5493 |
| LPE 22:5                                                              | 5.1811 | PC (4:0/16:3)                | 13.2348 | 5-methoxy-8,8-dimethyl-2-phenyl-4H,8H-pyrano[2,3-h]chromen-4-one | 10.3709 |

---

Table S1-2. Common and unique differential metabolites in nine groups ( negative ion mode )

| a.Common metabolites of three groups              |         |                                                        |         |                          |          |
|---------------------------------------------------|---------|--------------------------------------------------------|---------|--------------------------|----------|
| Description                                       | FC      | Description                                            | FC      | Description              | FC       |
| PKP3 vs. PKZ3                                     |         | PKP6 vs. PKZ6                                          |         | PKP15 vs. PKZ15          |          |
| (+/-)11(12)-EET                                   | 0.3521  | (+/-)11(12)-EET                                        | 2.4529  | (+/-)11(12)-EET          | 2.5204   |
| 23-Norcholic acid                                 | 0.4190  | 23-Norcholic acid                                      | 2.2299  | 23-Norcholic acid        | 4.0001   |
| b. Unique differential metabolites to both groups |         |                                                        |         |                          |          |
| Description                                       | FC      | Description                                            | FC      | Description              | FC       |
| PKP3 vs. PKZ3                                     |         | PKP6 vs. PKZ6                                          |         | PKP15 vs. PKZ15          |          |
| Rutarin                                           | 62.6512 | 6,8-di(tert-butyl)-4-oxo-4H-chromene-2-carboxylic acid | 61.5001 | Xanthosine               | 157.9254 |
| Hostanox O3                                       | 30.7755 | Coenzyme Q1                                            | 60.4358 | 3'-Hydroxystanozolol     | 55.2217  |
| Aminomalonic acid                                 | 22.1110 | Gibberellin A4                                         | 59.1137 | Androsterone glucuronide | 15.2596  |
| 8-Hydroxyguanosine                                | 16.7937 | (+/-)-Cannabichromeorcin                               | 52.3742 | Azelaic acid             | 14.5385  |
| Asparagine                                        | 16.4157 | Zeranol                                                | 29.0396 | N-Acetyl-L-histidine     | 12.5233  |
| D-(+)-Tryptophan                                  | 11.2461 | Benzyl 6-O-beta-D-glucopyranosyl-beta-D-               | 17.0667 | Salsolinol               | 12.0544  |

|                                                         |        |                                                                     |        |                                                                 |         |
|---------------------------------------------------------|--------|---------------------------------------------------------------------|--------|-----------------------------------------------------------------|---------|
|                                                         |        | glucopyranoside                                                     |        |                                                                 |         |
| Sildenafil-d3                                           | 9.2968 | N1-cyclohexyl-4-(4-fluorobenzyl)-1,4-diazepane-1-carbothioamide     | 9.6004 | Vitamin B2                                                      | 11.7548 |
| N-Acetyl-L-histidine                                    | 9.1932 | 3'-Hydroxystanozolol                                                | 9.5077 | N1-(2-pyridyl)-2-(3,5-difluorophenyl)acetamide                  | 10.4949 |
| 2'-Deoxyadenosine 5'-monophosphate (dAMP)               | 8.4852 | Inosine-5'-monophosphate (IMP)                                      | 8.9297 | N1-cyclohexyl-4-(4-fluorobenzyl)-1,4-diazepane-1-carbothioamide | 7.4454  |
| N1-(3-cyano-4,6-diphenyl-2-pyridyl)-4-methylbenzamide   | 8.0963 | N1-(3-amino-4-chlorophenyl)-2-[2,4-di(tert-pentyl)phenoxy]acetamide | 7.3286 | 5-Hydroxymethyluracil                                           | 7.2306  |
| N-(1-benzothiophen-3-yl)-N'-(1-benzyl-4-piperidiny)urea | 7.8845 | Folic acid                                                          | 6.7546 | Docosahexaenoyl Ethanolamide                                    | 7.0888  |
| Gly-Tyr-Ala                                             | 7.5185 | Feruloyl Putrescine                                                 | 6.5902 | Salvinorin B                                                    | 6.1297  |
| Deoxyadenosine                                          | 7.4527 | Deoxyadenosine                                                      | 6.2007 | 8-iso-15-keto Prostaglandin E2                                  | 5.4396  |
| Prostaglandin A1                                        | 7.3718 | L-Glutathione (reduced)                                             | 6.0419 | Caffeine                                                        | 5.2142  |
| N7-Methylguanosine                                      | 6.6791 | Prostaglandin K1                                                    | 5.7676 | D-(-)-Fructose                                                  | 5.1705  |
| Thymidine 5'-monophosphate                              | 6.0751 | GlcADG (16:0-18:2)                                                  | 5.4869 | 3-benzyl-1-butyl-4-hydroxy-1,2-                                 | 4.8619  |



|                                                                     |        |                    |        |                                                                  |        |
|---------------------------------------------------------------------|--------|--------------------|--------|------------------------------------------------------------------|--------|
|                                                                     |        |                    |        | dihydroquinolin-2-one                                            |        |
| Phenylacetaldehyde                                                  | 6.0551 | Mycophenolic acid  | 5.3574 | Docosahexaenoic Acid                                             | 4.5676 |
| N1-(5-oxo-5H-chromeno[2,3-b]pyridin-7-yl)-4-nitrobenzamide          | 5.8203 | Thymidine          | 5.2554 | Cholic acid                                                      | 4.3308 |
| Benzyl 6-O-beta-D-glucopyranosyl-beta-D-glucopyranoside             | 5.7219 | Narasin            | 5.0710 | (±)11(12)-DiHET                                                  | 4.0211 |
| 2-{1-[2-(4-benzhydrylpiperazino)-2-oxoethyl]cyclopentyl}acetic acid | 5.5094 | GlcADG (18:2-18:2) | 4.9519 | 2-(1-{2-[(3-furylmethyl)amino]-2-oxoethyl}cyclohexyl)acetic acid | 3.9370 |

| a.Common metabolites of three groups |        |                       |         |                       |        |
|--------------------------------------|--------|-----------------------|---------|-----------------------|--------|
| Description                          | FC     | Description           | FC      | Description           | FC     |
| PKP3 vs. PKP6                        |        | PKP3 vs. PKP15        |         | PKP6 vs. PKP15        |        |
| 5,5-Dimethylhydantoin                | 3.3892 | 5,5-Dimethylhydantoin | 10.5113 | 5,5-Dimethylhydantoin | 3.1014 |
| D-(-)-Glutamine                      | 3.3594 | D-(-)-Glutamine       | 14.6278 | D-(-)-Glutamine       | 4.3543 |
| Dibenzoyl Thiamine                   | 2.9047 | Dibenzoyl Thiamine    | 7.0451  | Dibenzoyl Thiamine    | 2.4254 |
| Verbascose                           | 5.0204 | Verbascose            | 19.8069 | Verbascose            | 3.9453 |

|                                |        |                            |         |                            |        |
|--------------------------------|--------|----------------------------|---------|----------------------------|--------|
| Maltotetraose                  | 3.2698 | Maltotetraose              | 8.4133  | Maltotetraose              | 2.5730 |
| D-Ala-D-Ala                    | 4.0528 | D-Ala-D-Ala                | 9.6641  | D-Ala-D-Ala                | 2.3845 |
| Tyrosol                        | 0.5153 | Tyrosol                    | 0.3287  | Tyrosol                    | 0.6378 |
| LPC 18:3                       | 8.6515 | LPC 18:3                   | 56.8028 | LPC 18:3                   | 6.5656 |
| 9-HpOTrE                       | 4.0075 | 9-HpOTrE                   | 9.9756  | 9-HpOTrE                   | 2.4893 |
| Thymidine 5'-<br>monophosphate | 3.0396 | Thymidine 5'-monophosphate | 14.6501 | Thymidine 5'-monophosphate | 4.8197 |
| (±)9-HpODE                     | 0.5824 | (±)9-HpODE                 | 0.2821  | (±)9-HpODE                 | 0.4843 |

**b. Unique differential metabolites to both groups**

| Description       | FC      | Description    | FC       | Description                                                | FC      |
|-------------------|---------|----------------|----------|------------------------------------------------------------|---------|
| PKP3 vs. PKP6     |         | PKP3 vs. PKP15 |          | PKP6 vs. PKP15                                             |         |
| LPA 18:3          | 91.4161 | Rutarin        | 132.5498 | N",N""-di[1-(4-nitrophenyl)ethylidene]carbonic dihydrazide | 19.4371 |
| Rutarin           | 64.8773 | LPG 18:3       | 68.0944  | Benzyl 6-O-beta-D-glucopyranosyl-beta-D-glucopyranoside    | 11.9748 |
| Aminomalonic acid | 47.5402 | LPI 18:3       | 67.2374  | L-Glutathione (reduced)                                    | 11.4574 |

|                      |         |                                                            |         |                                                             |         |
|----------------------|---------|------------------------------------------------------------|---------|-------------------------------------------------------------|---------|
| PA (16:0/18:3)       | 34.9129 | LPE 18:3                                                   | 62.7999 | 6,7-Dihydroxycoumarin                                       | 11.3955 |
| PA (16:2/18:2)       | 31.6808 | Aminomalonic acid                                          | 50.5391 | Tauro-alpha-Muricholic acid sodium salt                     | 10.5882 |
| LPE 18:3             | 30.5079 | Piceatannol                                                | 33.9669 | N3-(4-chlorophenyl)-4-(trifluoromethyl)nicotinamide         | 10.0018 |
| LPG 18:3             | 30.0650 | LPA 18:3                                                   | 32.1503 | 2-[2-(2,3,4-trifluorophenyl)hydrazono]malononitrile         | 8.7258  |
| LPI 18:3             | 27.7440 | PA (16:0/18:3)                                             | 23.7362 | 1-(2,4-dihydroxyphenyl)-2-(3,5-dimethoxyphenyl)propan-1-one | 7.1617  |
| Asparagine           | 24.0636 | N1-(5-oxo-5H-chromeno[2,3-b]pyridin-7-yl)-4-nitrobenzamide | 23.6193 | 8,15-Dihete                                                 | 6.8343  |
| PA (17:1/18:2)       | 21.9017 | Dodecanedioic acid                                         | 22.2194 | 2'-Deoxyadenosine 5'-monophosphate (dAMP)                   | 6.7673  |
| Testosterone sulfate | 19.8544 | PA (16:2/18:2)                                             | 21.9415 | Thromboxane B1                                              | 6.5049  |
| PA (16:0/18:2)       | 18.7880 | Hostanox O3                                                | 20.3208 | Guanosine monophosphate (GMP)                               | 6.4999  |
| PA (14:0/18:2)       | 17.9167 | 2'-Deoxyadenosine 5'-monophosphate (dAMP)                  | 16.8463 | Inosine-5'-monophosphate (IMP)                              | 6.3397  |
| Hostanox O3          | 15.1036 | PG (18:2/18:3)                                             | 14.4456 | Genistein                                                   | 5.5782  |
| Piceatannol          | 14.7609 | Benzyl 6-O-beta-D-glucopyranosyl-beta-D-glucopyranoside    | 14.2826 | Folic acid                                                  | 5.4115  |
| 8-Hydroxyguanosine   | 13.5663 | Testosterone sulfate                                       | 13.3091 | 4-phenyl-2-[(3-pyridylamino)methylidene]cyclohexane-        | 4.2029  |

|                                           |         |                                                             |         |                                  |        |
|-------------------------------------------|---------|-------------------------------------------------------------|---------|----------------------------------|--------|
|                                           |         |                                                             |         | 1,3-dione                        |        |
| PG (18:2/18:3)                            | 13.4672 | Lysopc 18:3                                                 | 13.1846 | Deoxyadenosine                   | 4.1244 |
| LPA 17:2                                  | 13.4464 | Deoxyadenosine                                              | 11.2403 | Phloretin                        | 4.0891 |
| N7-Methylguanosine                        | 10.0553 | 1-(2,4-dihydroxyphenyl)-2-(3,5-dimethoxyphenyl)propan-1-one | 11.0452 | TPP                              | 4.0868 |
| Oleoyl-L- $\alpha$ -lysophosphatidic acid | 9.9657  | 8,15-Dihete                                                 | 10.9218 | (2R)-2,3-Dihydroxypropanoic acid | 3.7585 |

**a.Common metabolites of three groups**

| Description           | FC     | Description           | FC      | Description           | FC     |
|-----------------------|--------|-----------------------|---------|-----------------------|--------|
| PKZ3 vs. PKZ6         |        | PKZ3 vs. PKZ15        |         | PKZ6 vs. PKZ15        |        |
| Caffeine              | 3.5749 | Caffeine              | 13.6481 | Caffeine              | 3.8178 |
| 3-Isopropylmalic acid | 2.3267 | 3-Isopropylmalic acid | 4.6066  | 3-Isopropylmalic acid | 1.9799 |
| Prolylleucine         | 1.5168 | Prolylleucine         | 5.1978  | Prolylleucine         | 3.4269 |
| Mevalonic acid        | 2.0975 | Mevalonic acid        | 4.4241  | Mevalonic acid        | 2.1092 |
| Apigenin              | 2.4030 | Apigenin              | 8.3076  | Apigenin              | 3.4571 |

|                                                                |        |                                                                |         |                                                                |        |
|----------------------------------------------------------------|--------|----------------------------------------------------------------|---------|----------------------------------------------------------------|--------|
| Dulcitol                                                       | 1.5788 | Dulcitol                                                       | 2.9870  | Dulcitol                                                       | 1.8919 |
| LPS 18:3                                                       | 4.2980 | LPS 18:3                                                       | 16.8302 | LPS 18:3                                                       | 3.9158 |
| 3-(1-cyano-1,2-dihydroisoquinolin-2-yl)-3-oxopropyl propionate | 1.8031 | 3-(1-cyano-1,2-dihydroisoquinolin-2-yl)-3-oxopropyl propionate | 3.6752  | 3-(1-cyano-1,2-dihydroisoquinolin-2-yl)-3-oxopropyl propionate | 2.0383 |
| Undecanedioic acid                                             | 6.0091 | Undecanedioic acid                                             | 27.6346 | Undecanedioic acid                                             | 4.5988 |
| 3-[4-(tert-butyl)anilino]-2-(3-thienylcarbonyl)acrylonitrile   | 2.2217 | 3-[4-(tert-butyl)anilino]-2-(3-thienylcarbonyl)acrylonitrile   | 5.1265  | 3-[4-(tert-butyl)anilino]-2-(3-thienylcarbonyl)acrylonitrile   | 2.3075 |
| 3-Methyl-2-oxobutanoic acid                                    | 0.5888 | 3-Methyl-2-oxobutanoic acid                                    | 0.3241  | 3-Methyl-2-oxobutanoic acid                                    | 0.5504 |
| Glycerol 3-phosphate                                           | 0.4681 | Glycerol 3-phosphate                                           | 0.1861  | Glycerol 3-phosphate                                           | 0.3975 |

**b. Unique differential metabolites to both groups**

| Description              | FC      | Description    | FC      | Description       | FC      |
|--------------------------|---------|----------------|---------|-------------------|---------|
| PKZ3 vs. PKZ6            |         | PKZ3 vs. PKZ15 |         | PKZ6 vs. PKZ15    |         |
| Coenzyme Q1              | 98.6022 | LPC 18:3       | 78.1745 | Genipin           | 28.7049 |
| Gibberellin A4           | 82.1640 | LPC 16:1       | 44.1092 | LPC 16:1          | 22.0243 |
| (+/-)-Cannabichromeorcin | 61.4006 | LPI 18:2       | 37.0379 | Salsolinol        | 19.5604 |
| Zeranol                  | 22.4005 | LPC 16:2       | 26.0551 | D-(-)-Quinic acid | 14.5743 |

|                                                                  |         |                                                           |         |                                                                |         |
|------------------------------------------------------------------|---------|-----------------------------------------------------------|---------|----------------------------------------------------------------|---------|
| LPE 18:3                                                         | 12.8110 | LPE 18:3                                                  | 24.6795 | LPC 16:2                                                       | 14.4672 |
| tetranor-PGFM                                                    | 10.9494 | D-(-)-Quinic acid                                         | 23.2815 | LPI 18:2                                                       | 13.8288 |
| Narasin                                                          | 9.7056  | LPI 18:3                                                  | 22.8135 | Gallic acid                                                    | 13.0458 |
| FAHFA (18:2/10:0)                                                | 9.3528  | LPC 18:2                                                  | 22.7273 | LPC 18:3                                                       | 12.7979 |
| GlcADG (16:0-18:2)                                               | 8.0818  | Lysopc 18:2                                               | 22.6856 | 3-[3-(beta-D-Glucopyranosyloxy)-2-hydroxyphenyl]propanoic acid | 12.4788 |
| Piceatannol                                                      | 7.5927  | 3'-Dephosphocoenzyme A                                    | 22.0850 | Lysopc 18:2                                                    | 11.7017 |
| 2-(1-{2-[(3-furylmethyl)amino]-2-oxoethyl}cyclohexyl)acetic acid | 6.3912  | tetranor-PGFM                                             | 21.5348 | diethyl 2-[(4-methoxy-2-nitroanilino)methylidene]malonate      | 10.7363 |
| N-glycyl-L-proline                                               | 5.3298  | diethyl 2-[(4-methoxy-2-nitroanilino)methylidene]malonate | 20.8301 | LPC 18:2                                                       | 10.0167 |
| FAHFA (18:1/10:0)                                                | 5.2115  | LPI 18:1                                                  | 18.9526 | Cholic acid                                                    | 9.4143  |
| 3'-Hydroxystanzolol                                              | 5.1955  | GlcADG (16:0-18:2)                                        | 18.6546 | 4-Hydroxyisoleucine                                            | 8.8316  |
| Ursolic acid                                                     | 5.0929  | Gallic acid                                               | 18.6002 | 7-Methyladenine                                                | 8.3057  |
| Lysopc 18:3                                                      | 4.8323  | LPE 18:2                                                  | 18.1507 | Prostaglandin E2                                               | 7.8355  |
| Rutarin                                                          | 4.7291  | LPC 17:2                                                  | 14.0807 | Glycoursodeoxycholic acid                                      | 7.5775  |

|                                                                     |        |                 |         |                                                          |        |
|---------------------------------------------------------------------|--------|-----------------|---------|----------------------------------------------------------|--------|
| N1-(3-amino-4-chlorophenyl)-2-[2,4-di(tert-pentyl)phenoxy]acetamide | 4.2728 | 7-Methyladenine | 13.6767 | L-Methionine sulfone                                     | 7.4558 |
| L-Glutathione (reduced)                                             | 3.8963 | Lysopc 18:3     | 12.8850 | Corchorifatty acid F                                     | 6.6531 |
| LPE 16:1                                                            | 3.8552 | LPG 18:3        | 11.3536 | O1-(4-chlorobenzoyl)-4-nitrobenzene-1-carbohydroximamide | 6.6230 |

---
