# Supplementary material for: Differential Metabolomics Reveals Pathogenesis of Pestalotiopsis kenyana Causing Leaf Spot Disease of Zanthoxylum schinifolium
Source: MDPI journal article supplement (doi:10.3390/jof8111208), 2022-11-15
Supplement: s1 [file s1]

Table S2-1 Enrichment analysis of the top 20 metabolic pathways in nine groups ( positive ion mode )

| PKP3 vs. PKZ3                                       |          |       | PKP6 vs. PKZ6                                 |          |       | PKP15 vs. PKZ15                             |          |       |
|-----------------------------------------------------|----------|-------|-----------------------------------------------|----------|-------|---------------------------------------------|----------|-------|
| Pathway Name                                        | Pvalue   | Count | Pathway Name                                  | Pvalue   | Count | Pathway Name                                | Pvalue   | Count |
| Monobactam biosynthesis                             | 9.08E-03 | 4     | Oxidative phosphorylation                     | 4.17E-02 | 2     | Tyrosine metabolism                         | 3.39E-02 | 6     |
| Ubiquinone and other terpenoid-quinone biosynthesis | 3.49E-02 | 3     | Riboflavin metabolism                         | 4.17E-02 | 2     | Pyrimidine metabolism                       | 6.07E-02 | 5     |
| Sulfur relay system                                 | 4.85E-02 | 2     | Vitamin B6 metabolism                         | 1.03E-01 | 3     | Cysteine and methionine metabolism          | 9.05E-02 | 3     |
| Arginine and proline metabolism                     | 1.13E-01 | 4     | Fatty acid biosynthesis                       | 1.09E-01 | 2     | alpha-Linolenic acid metabolism             | 9.84E-02 | 2     |
| Biotin metabolism                                   | 1.25E-01 | 2     | Biotin metabolism                             | 1.09E-01 | 2     | Glutathione metabolism                      | 1.37E-01 | 3     |
| Cysteine and methionine metabolism                  | 1.25E-01 | 3     | Fatty acid elongation                         | 2.06E-01 | 1     | Synthesis and degradation of ketone bodies  | 1.96E-01 | 1     |
| Pyrimidine metabolism                               | 1.43E-01 | 5     | Fatty acid degradation                        | 2.06E-01 | 1     | beta-Alanine metabolism                     | 2.53E-01 | 2     |
| Phenylalanine, tyrosine and tryptophan biosynthesis | 1.85E-01 | 3     | Cutin, suberine and wax biosynthesis          | 2.06E-01 | 1     | Vitamin B6 metabolism                       | 3.34E-01 | 2     |
| Cyanoamino acid metabolism                          | 2.14E-01 | 2     | Starch and sucrose metabolism                 | 2.06E-01 | 1     | Pentose phosphate pathway                   | 3.54E-01 | 1     |
| Staurosporine biosynthesis                          | 2.22E-01 | 1     | Sesquiterpenoid and triterpenoid biosynthesis | 2.06E-01 | 1     | Valine, leucine and isoleucine degradation  | 3.54E-01 | 1     |
| Sesquiterpenoid and triterpenoid biosynthesis       | 2.22E-01 | 1     | Fatty acid metabolism                         | 2.06E-01 | 1     | Propanoate metabolism                       | 3.54E-01 | 1     |
| Tryptophan metabolism                               | 2.66E-01 | 4     | Aflatoxin biosynthesis                        | 3.71E-01 | 1     | Thiamine metabolism                         | 3.54E-01 | 1     |
| beta-Alanine metabolism                             | 3.08E-01 | 2     | Thiamine metabolism                           | 3.71E-01 | 1     | Tryptophan metabolism                       | 4.53E-01 | 3     |
| Pantothenate and CoA biosynthesis                   | 3.08E-01 | 2     | Purine metabolism                             | 4.33E-01 | 3     | Galactose metabolism                        | 4.82E-01 | 1     |
| Biosynthesis of amino acids                         | 3.30E-01 | 5     | Phenylalanine metabolism                      | 4.33E-01 | 3     | Amino sugar and nucleotide sugar metabolism | 4.82E-01 | 1     |
| Arachidonic acid metabolism                         | 3.79E-01 | 3     | Galactose metabolism                          | 5.02E-01 | 1     | Carbon metabolism                           | 4.82E-01 | 1     |

|                                            |          |   |                                         |          |   |                                          |          |   |
|--------------------------------------------|----------|---|-----------------------------------------|----------|---|------------------------------------------|----------|---|
| Aminoacyl-tRNA biosynthesis                | 3.79E-01 | 3 | alpha-Linolenic acid metabolism         | 5.02E-01 | 1 | Cyanoamino acid metabolism               | 5.85E-01 | 1 |
| Valine, leucine and isoleucine degradation | 3.96E-01 | 1 | Methane metabolism                      | 5.02E-01 | 1 | Butanoate metabolism                     | 5.85E-01 | 1 |
| Lysine biosynthesis                        | 3.96E-01 | 1 | Biosynthesis of unsaturated fatty acids | 5.02E-01 | 1 | Glycine, serine and threonine metabolism | 1.00E+00 | 1 |
| D-Arginine and D-ornithine metabolism      | 3.96E-01 | 1 | Carbon metabolism                       | 5.02E-01 | 1 | Phenylalanine metabolism                 | 1.00E+00 | 2 |

| PKP3 vs. PKP6                           |          |       | PKP3 vs. PKP15                           |          |       | PKP6 vs. PKP15                             |          |       |
|-----------------------------------------|----------|-------|------------------------------------------|----------|-------|--------------------------------------------|----------|-------|
| Pathway Name                            | Pvalue   | Count | Pathway Name                             | Pvalue   | Count | Pathway Name                               | Pvalue   | Count |
| Riboflavin metabolism                   | 7.46E-02 | 2     | Fatty acid biosynthesis                  | 1.56E-02 | 3     | Fatty acid biosynthesis                    | 1.37E-02 | 3     |
| Biotin metabolism                       | 1.84E-01 | 2     | Biosynthesis of unsaturated fatty acids  | 1.56E-02 | 3     | Aflatoxin biosynthesis                     | 5.83E-02 | 2     |
| Biosynthesis of unsaturated fatty acids | 1.84E-01 | 2     | Galactose metabolism                     | 1.59E-01 | 2     | Riboflavin metabolism                      | 5.83E-02 | 2     |
| Arachidonic acid metabolism             | 2.19E-01 | 4     | Vitamin B6 metabolism                    | 1.73E-01 | 3     | Histidine metabolism                       | 1.56E-01 | 3     |
| Metabolic pathways                      | 2.59E-01 | 40    | Fatty acid elongation                    | 2.54E-01 | 1     | Vitamin B6 metabolism                      | 1.56E-01 | 3     |
| Fatty acid elongation                   | 2.75E-01 | 1     | Fatty acid degradation                   | 2.54E-01 | 1     | Fatty acid elongation                      | 2.43E-01 | 1     |
| Fatty acid degradation                  | 2.75E-01 | 1     | Cutin, suberine and wax biosynthesis     | 2.54E-01 | 1     | Fatty acid degradation                     | 2.43E-01 | 1     |
| Cutin, suberine and wax biosynthesis    | 2.75E-01 | 1     | Starch and sucrose metabolism            | 2.54E-01 | 1     | Cutin, suberine and wax biosynthesis       | 2.43E-01 | 1     |
| Staurosporine biosynthesis              | 2.75E-01 | 1     | Fatty acid metabolism                    | 2.54E-01 | 1     | One carbon pool by folate                  | 2.43E-01 | 1     |
| Starch and sucrose metabolism           | 2.75E-01 | 1     | Purine metabolism                        | 2.78E-01 | 4     | Fatty acid metabolism                      | 2.43E-01 | 1     |
| Fatty acid metabolism                   | 2.75E-01 | 1     | Metabolic pathways                       | 2.79E-01 | 37    | Oxidative phosphorylation                  | 4.29E-01 | 1     |
| Butanoate metabolism                    | 3.04E-01 | 2     | Pentose and glucuronate interconversions | 4.44E-01 | 1     | Valine, leucine and isoleucine degradation | 4.29E-01 | 1     |
| Porphyryn and chlorophyll metabolism    | 3.04E-01 | 2     | Aflatoxin biosynthesis                   | 4.44E-01 | 1     | Propanoate metabolism                      | 4.29E-01 | 1     |
| Cysteine and methionine metabolism      | 3.49E-01 | 3     | Valine, leucine and isoleucine           | 4.44E-01 | 1     | Galactose metabolism                       | 5.69E-01 | 1     |

|                                            |          |   |                                             |          |   |                                         |          |    |
|--------------------------------------------|----------|---|---------------------------------------------|----------|---|-----------------------------------------|----------|----|
| Pentose and glucuronate interconversions   | 4.76E-01 | 1 | Carbapenem biosynthesis                     | 4.44E-01 | 1 | Biosynthesis of unsaturated fatty acids | 5.69E-01 | 1  |
| Oxidative phosphorylation                  | 4.76E-01 | 1 | Nitrogen metabolism                         | 4.44E-01 | 1 | beta-Alanine metabolism                 | 5.97E-01 | 2  |
| Aflatoxin biosynthesis                     | 4.76E-01 | 1 | beta-Alanine metabolism                     | 6.03E-01 | 2 | Biosynthesis of secondary metabolites   | 6.11E-01 | 15 |
| Valine, leucine and isoleucine degradation | 4.76E-01 | 1 | Alanine, aspartate and glutamate metabolism | 6.45E-01 | 2 | Cysteine and methionine metabolism      | 6.34E-01 | 2  |
| Carbapenem biosynthesis                    | 4.76E-01 | 1 | Cysteine and methionine metabolism          | 6.45E-01 | 2 | Lysine degradation                      | 6.34E-01 | 2  |
| Taurine and hypotaurine metabolism         | 4.76E-01 | 1 | Lysine degradation                          | 6.45E-01 | 2 | Glycerophospholipid metabolism          | 1.00E+00 | 1  |

| PKZ3 vs. PKZ6                        |          |       | PKZ3 vs. PKZ15                                      |          |       | PKZ6 vs. PKZ15                             |          |       |
|--------------------------------------|----------|-------|-----------------------------------------------------|----------|-------|--------------------------------------------|----------|-------|
| Pathway Name                         | Pvalue   | Count | Pathway Name                                        | Pvalue   | Count | Pathway Name                               | Pvalue   | Count |
| Lysine degradation                   | 7.83E-02 | 3     | Fatty acid biosynthesis                             | 4.94E-02 | 3     | Histidine metabolism                       | 7.72E-02 | 4     |
| Fatty acid biosynthesis              | 8.87E-02 | 2     | Methane metabolism                                  | 4.94E-02 | 3     | Vitamin B6 metabolism                      | 7.72E-02 | 4     |
| alpha-Linolenic acid metabolism      | 8.87E-02 | 2     | beta-Alanine metabolism                             | 6.36E-02 | 4     | Valine, leucine and isoleucine degradation | 9.63E-02 | 2     |
| Biotin metabolism                    | 8.87E-02 | 2     | Pantothenate and CoA biosynthesis                   | 6.36E-02 | 4     | Propanoate metabolism                      | 9.63E-02 | 2     |
| Purine metabolism                    | 9.06E-02 | 4     | Phenylalanine, tyrosine and tryptophan biosynthesis | 1.03E-01 | 5     | beta-Alanine metabolism                    | 1.77E-01 | 3     |
| Fatty acid elongation                | 1.85E-01 | 1     | Pyrimidine metabolism                               | 1.31E-01 | 7     | Pantothenate and CoA biosynthesis          | 1.77E-01 | 3     |
| Fatty acid degradation               | 1.85E-01 | 1     | Oxidative phosphorylation                           | 1.36E-01 | 2     | alpha-Linolenic acid metabolism            | 2.30E-01 | 2     |
| Cutin, suberine and wax biosynthesis | 1.85E-01 | 1     | Valine, leucine and isoleucine degradation          | 1.36E-01 | 2     | Synthesis and degradation of ketone bodies | 3.12E-01 | 1     |
| Caffeine metabolism                  | 1.85E-01 | 1     | Propanoate metabolism                               | 1.36E-01 | 2     | Staurosporine biosynthesis                 | 3.12E-01 | 1     |
| Starch and sucrose metabolism        | 1.85E-01 | 1     | Riboflavin metabolism                               | 1.36E-01 | 2     | Mannose type O-glycan biosynthesis         | 3.12E-01 | 1     |

|                                             |          |   |                                            |          |   |                                          |          |    |
|---------------------------------------------|----------|---|--------------------------------------------|----------|---|------------------------------------------|----------|----|
| Fatty acid metabolism                       | 1.85E-01 | 1 | Lysine degradation                         | 1.96E-01 | 4 | Biosynthesis of secondary metabolites    | 3.58E-01 | 20 |
| Alanine, aspartate and glutamate metabolism | 3.08E-01 | 2 | Fatty acid elongation                      | 3.70E-01 | 1 | Pentose phosphate pathway                | 5.28E-01 | 1  |
| Oxidative phosphorylation                   | 3.37E-01 | 1 | Fatty acid degradation                     | 3.70E-01 | 1 | Pentose and glucuronate interconversions | 5.28E-01 | 1  |
| Valine, leucine and isoleucine biosynthesis | 3.37E-01 | 1 | Synthesis and degradation of ketone bodies | 3.70E-01 | 1 | Oxidative phosphorylation                | 5.28E-01 | 1  |
| Carbapenem biosynthesis                     | 3.37E-01 | 1 | Cutin, suberine and wax biosynthesis       | 3.70E-01 | 1 | Aflatoxin biosynthesis                   | 5.28E-01 | 1  |
| Thiamine metabolism                         | 3.37E-01 | 1 | Starch and sucrose metabolism              | 3.70E-01 | 1 | Carbapenem biosynthesis                  | 5.28E-01 | 1  |
| Riboflavin metabolism                       | 3.37E-01 | 1 | Mannose type O-glycan biosynthesis         | 3.70E-01 | 1 | Taurine and hypotaurine metabolism       | 5.28E-01 | 1  |
| Arginine and proline metabolism             | 3.71E-01 | 3 | Linoleic acid metabolism                   | 3.70E-01 | 1 | Thiamine metabolism                      | 5.28E-01 | 1  |
| Galactose metabolism                        | 4.61E-01 | 1 | Fatty acid metabolism                      | 3.70E-01 | 1 | Riboflavin metabolism                    | 5.28E-01 | 1  |
| C5-Branched dibasic acid metabolism         | 4.61E-01 | 1 | Phenylalanine metabolism                   | 5.03E-01 | 5 | Nitrogen metabolism                      | 5.28E-01 | 1  |

---

Table S2-2 Enrichment analysis of the top 20 metabolic pathways in nine groups ( negative ion mode )

| PKP3 vs. PKZ3                                           |          |       | PKP6 vs. PKZ6                          |          |       | PKP15 vs. PKZ15                                     |          |       |
|---------------------------------------------------------|----------|-------|----------------------------------------|----------|-------|-----------------------------------------------------|----------|-------|
| Pathway Name                                            | Pvalue   | Count | Pathway Name                           | Pvalue   | Count | Pathway Name                                        | Pvalue   | Count |
| Lysine degradation                                      | 9.08E-02 | 2     | Inositol phosphate metabolism          | 4.76E-02 | 2     | Biosynthesis of unsaturated fatty acids             | 9.58E-02 | 4     |
| Starch and sucrose metabolism                           | 9.08E-02 | 2     | Caffeine metabolism                    | 1.23E-01 | 2     | Caffeine metabolism                                 | 1.14E-01 | 2     |
| Folate biosynthesis                                     | 9.08E-02 | 2     | Thiamine metabolism                    | 1.23E-01 | 2     | Arginine and proline metabolism                     | 1.99E-01 | 2     |
| Amino sugar and nucleotide sugar metabolism             | 1.61E-01 | 2     | Riboflavin metabolism                  | 1.23E-01 | 2     | Amino sugar and nucleotide sugar metabolism         | 1.99E-01 | 2     |
| Phenylalanine metabolism                                | 1.72E-01 | 3     | Glycolysis / Gluconeogenesis           | 2.12E-01 | 2     | Arachidonic acid metabolism                         | 1.99E-01 | 2     |
| ABC transporters                                        | 1.72E-01 | 3     | Oxidative phosphorylation              | 2.12E-01 | 2     | Phosphonate and phosphinate metabolism              | 2.13E-01 | 1     |
| Fatty acid degradation                                  | 1.89E-01 | 1     | Arginine and proline metabolism        | 2.12E-01 | 2     | Glycerophospholipid metabolism                      | 2.13E-01 | 1     |
| Biosynthesis of siderophore group nonribosomal peptides | 1.89E-01 | 1     | Phosphonate and phosphinate metabolism | 2.21E-01 | 1     | Linoleic acid metabolism                            | 2.13E-01 | 1     |
| Aminoacyl-tRNA biosynthesis                             | 3.16E-01 | 2     | One carbon pool by folate              | 2.21E-01 | 1     | Taurine and hypotaurine metabolism                  | 2.88E-01 | 2     |
| 2-Oxocarboxylic acid metabolism                         | 3.16E-01 | 2     | RNA transport                          | 2.21E-01 | 1     | Phenylalanine, tyrosine and tryptophan biosynthesis | 3.82E-01 | 1     |
| Ascorbate and aldarate metabolism                       | 3.43E-01 | 1     | Endocytosis                            | 2.21E-01 | 1     | Sphingolipid metabolism                             | 3.82E-01 | 1     |
| Phenylalanine, tyrosine and tryptophan biosynthesis     | 3.43E-01 | 1     | Purine metabolism                      | 2.26E-01 | 4     | Diterpenoid biosynthesis                            | 3.82E-01 | 1     |
| Purine metabolism                                       | 3.97E-01 | 3     | Biosynthesis of secondary metabolites  | 2.73E-01 | 11    | Galactose metabolism                                | 5.16E-01 | 1     |
| Galactose metabolism                                    | 4.69E-01 | 1     | Metabolic pathways                     | 3.19E-01 | 21    | Riboflavin metabolism                               | 5.16E-01 | 1     |
| Glutathione metabolism                                  | 4.69E-01 | 1     | Fructose and mannose metabolism        | 3.95E-01 | 1     | Sulfur metabolism                                   | 5.16E-01 | 1     |
| Pantothenate and CoA biosynthesis                       | 4.69E-01 | 1     | Valine, leucine and isoleucine         | 3.95E-01 | 1     | Vancomycin resistance                               | 5.16E-01 | 1     |

|                                 |          |   |                                                                     |          |   |                              |          |    |
|---------------------------------|----------|---|---------------------------------------------------------------------|----------|---|------------------------------|----------|----|
| Biosynthesis of antibiotics     | 5.62E-01 | 5 | biosynthesis<br>Phenylalanine, tyrosine and tryptophan biosynthesis | 3.95E-01 | 1 | ABC transporters             | 6.78E-01 | 2  |
| Glycolysis / Gluconeogenesis    | 5.71E-01 | 1 | Terpenoid backbone biosynthesis                                     | 3.95E-01 | 1 | Metabolic pathways           | 7.00E-01 | 19 |
| Arginine and proline metabolism | 5.71E-01 | 1 | Diterpenoid biosynthesis                                            | 3.95E-01 | 1 | Glycolysis / Gluconeogenesis | 1.00E+00 | 1  |
| Tyrosine metabolism             | 5.71E-01 | 1 | Pyrimidine metabolism                                               | 4.13E-01 | 3 | Pyrimidine metabolism        | 1.00E+00 | 2  |

| PKP3 vs. PKP6                               |          |       | PKP3 vs. PKP15                              |          |       | PKP6 vs. PKP15                              |          |       |
|---------------------------------------------|----------|-------|---------------------------------------------|----------|-------|---------------------------------------------|----------|-------|
| Pathway Name                                | Pvalue   | Count | Pathway Name                                | Pvalue   | Count | Pathway Name                                | Pvalue   | Count |
| Vancomycin resistance                       | 1.38E-02 | 3     | Galactose metabolism                        | 2.63E-02 | 3     | Biosynthesis of unsaturated fatty acids     | 9.91E-03 | 6     |
| Oxidative phosphorylation                   | 4.56E-02 | 3     | Tyrosine metabolism                         | 8.27E-02 | 3     | Amino sugar and nucleotide sugar metabolism | 5.49E-02 | 3     |
| Tyrosine metabolism                         | 4.56E-02 | 3     | Valine, leucine and isoleucine biosynthesis | 9.02E-02 | 2     | Terpenoid backbone biosynthesis             | 6.72E-02 | 2     |
| Amino sugar and nucleotide sugar metabolism | 4.56E-02 | 3     | Terpenoid backbone biosynthesis             | 9.02E-02 | 2     | Valine, leucine and isoleucine degradation  | 1.68E-01 | 2     |
| Nicotinate and nicotinamide metabolism      | 6.11E-02 | 4     | Biosynthesis of unsaturated fatty acids     | 1.28E-01 | 5     | Thiamine metabolism                         | 1.68E-01 | 2     |
| Histidine metabolism                        | 9.48E-02 | 3     | Purine metabolism                           | 1.69E-01 | 5     | Fatty acid biosynthesis                     | 2.62E-01 | 1     |
| ABC transporters                            | 1.01E-01 | 4     | Nicotinate and nicotinamide metabolism      | 1.97E-01 | 4     | Cutin, suberine and wax biosynthesis        | 2.62E-01 | 1     |
| Lysine degradation                          | 1.49E-01 | 2     | Glutathione metabolism                      | 2.18E-01 | 2     | One carbon pool by folate                   | 2.62E-01 | 1     |
| Glutathione metabolism                      | 1.49E-01 | 2     | Starch and sucrose metabolism               | 2.18E-01 | 2     | Biotin metabolism                           | 2.62E-01 | 1     |
| Starch and sucrose metabolism               | 1.49E-01 | 2     | Butanoate metabolism                        | 2.18E-01 | 2     | RNA transport                               | 2.62E-01 | 1     |
| Butanoate metabolism                        | 1.49E-01 | 2     | Thiamine metabolism                         | 2.18E-01 | 2     | Endocytosis                                 | 2.62E-01 | 1     |

|                                             |          |   |                                             |          |   |                                             |          |   |
|---------------------------------------------|----------|---|---------------------------------------------|----------|---|---------------------------------------------|----------|---|
| Aminoacyl-tRNA biosynthesis                 | 1.58E-01 | 3 | Vitamin B6 metabolism                       | 2.18E-01 | 2 | Glycolysis / Gluconeogenesis                | 2.81E-01 | 2 |
| Fatty acid degradation                      | 2.46E-01 | 1 | Vancomycin resistance                       | 2.18E-01 | 2 | Pentose phosphate pathway                   | 2.81E-01 | 2 |
| Ascorbate and aldarate metabolism           | 4.33E-01 | 1 | Fatty acid biosynthesis                     | 3.03E-01 | 1 | Fructose and mannose metabolism             | 4.57E-01 | 1 |
| Arginine biosynthesis                       | 4.33E-01 | 1 | Cutin, suberine and wax biosynthesis        | 3.03E-01 | 1 | Valine, leucine and isoleucine biosynthesis | 4.57E-01 | 1 |
| Monobactam biosynthesis                     | 4.33E-01 | 1 | Glycerophospholipid metabolism              | 3.03E-01 | 1 | Lysine biosynthesis                         | 4.57E-01 | 1 |
| Valine, leucine and isoleucine biosynthesis | 4.33E-01 | 1 | RNA transport                               | 3.03E-01 | 1 | Tryptophan metabolism                       | 4.57E-01 | 1 |
| Cyanoamino acid metabolism                  | 4.33E-01 | 1 | Endocytosis                                 | 3.03E-01 | 1 | Inositol phosphate metabolism               | 4.57E-01 | 1 |
| Sphingolipid metabolism                     | 4.33E-01 | 1 | Alanine, aspartate and glutamate metabolism | 4.32E-01 | 3 | beta-Alanine metabolism                     | 6.06E-01 | 2 |
| Cysteine and methionine metabolism          | 5.96E-01 | 2 | Fructose and mannose metabolism             | 5.16E-01 | 1 | 2-Oxocarboxylic acid metabolism             | 6.52E-01 | 2 |

| PKZ3 vs. PKZ6                               |          |       | PKZ3 vs. PKZ15                              |          |       | PKZ6 vs. PKZ15                             |          |       |
|---------------------------------------------|----------|-------|---------------------------------------------|----------|-------|--------------------------------------------|----------|-------|
| Pathway Name                                | Pvalue   | Count | Pathway Name                                | Pvalue   | Count | Pathway Name                               | Pvalue   | Count |
| Biosynthesis of secondary metabolites       | 6.92E-03 | 14    | Thiamine metabolism                         | 3.35E-02 | 3     | Oxidative phosphorylation                  | 6.71E-03 | 4     |
| Galactose metabolism                        | 8.81E-03 | 3     | Metabolic pathways                          | 7.63E-02 | 32    | Phenylalanine metabolism                   | 4.82E-02 | 5     |
| Valine, leucine and isoleucine biosynthesis | 4.40E-02 | 2     | Oxidative phosphorylation                   | 1.03E-01 | 3     | Tyrosine metabolism                        | 7.66E-02 | 3     |
| Lysine biosynthesis                         | 4.40E-02 | 2     | Tyrosine metabolism                         | 1.03E-01 | 3     | Arachidonic acid metabolism                | 7.66E-02 | 3     |
| Terpenoid backbone biosynthesis             | 4.40E-02 | 2     | Valine, leucine and isoleucine biosynthesis | 1.06E-01 | 2     | Caffeine metabolism                        | 2.08E-01 | 2     |
| ABC transporters                            | 6.25E-02 | 4     | Inositol phosphate metabolism               | 1.06E-01 | 2     | Valine, leucine and isoleucine degradation | 2.08E-01 | 2     |
| 2-Oxocarboxylic acid metabolism             | 1.10E-01 | 3     | Terpenoid backbone biosynthesis             | 1.06E-01 | 2     | Propanoate metabolism                      | 2.08E-01 | 2     |

|                                   |          |    |                                            |          |   |                                             |          |   |
|-----------------------------------|----------|----|--------------------------------------------|----------|---|---------------------------------------------|----------|---|
| Caffeine metabolism               | 1.14E-01 | 2  | Phenylalanine metabolism                   | 1.12E-01 | 5 | Butanoate metabolism                        | 2.08E-01 | 2 |
| Starch and sucrose metabolism     | 1.14E-01 | 2  | Galactose metabolism                       | 2.50E-01 | 2 | Thiamine metabolism                         | 2.08E-01 | 2 |
| Pantothenate and CoA biosynthesis | 1.14E-01 | 2  | Valine, leucine and isoleucine degradation | 2.50E-01 | 2 | Sulfur metabolism                           | 2.08E-01 | 2 |
| Metabolic pathways                | 1.83E-01 | 21 | Butanoate metabolism                       | 2.50E-01 | 2 | Vancomycin resistance                       | 2.08E-01 | 2 |
| Pentose phosphate pathway         | 1.99E-01 | 2  | Riboflavin metabolism                      | 2.50E-01 | 2 | Cutin, suberine and wax biosynthesis        | 2.95E-01 | 1 |
| Linoleic acid metabolism          | 2.13E-01 | 1  | Vitamin B6 metabolism                      | 2.50E-01 | 2 | Linoleic acid metabolism                    | 2.95E-01 | 1 |
| Biotin metabolism                 | 2.13E-01 | 1  | Purine metabolism                          | 2.94E-01 | 5 | Porphyrin and chlorophyll metabolism        | 2.95E-01 | 1 |
| RNA transport                     | 2.13E-01 | 1  | Cutin, suberine and wax biosynthesis       | 3.28E-01 | 1 | Citrate cycle (TCA cycle)                   | 3.59E-01 | 3 |
| Endocytosis                       | 2.13E-01 | 1  | RNA transport                              | 3.28E-01 | 1 | Pyruvate metabolism                         | 4.20E-01 | 3 |
| beta-Alanine metabolism           | 2.88E-01 | 2  | Endocytosis                                | 3.28E-01 | 1 | Nicotinate and nicotinamide metabolism      | 4.20E-01 | 3 |
| Fructose and mannose metabolism   | 3.82E-01 | 1  | 2-Oxocarboxylic acid metabolism            | 3.92E-01 | 3 | Biosynthesis of unsaturated fatty acids     | 4.47E-01 | 4 |
| Arginine biosynthesis             | 3.82E-01 | 1  | Pyrimidine metabolism                      | 4.73E-01 | 4 | Arginine biosynthesis                       | 5.05E-01 | 1 |
| Monobactam biosynthesis           | 3.82E-01 | 1  | Fructose and mannose metabolism            | 5.50E-01 | 1 | Valine, leucine and isoleucine biosynthesis | 5.05E-01 | 1 |

---
